# Supplementary material for: Cashing Out Retirement Savings at Job Separation
Source: Atypon-hosted journal article supplement (doi:10.1287/mksc.2022.1404), 2022-11-08
Supplement: mksc.2022.1404.sm1.pdf [file mksc.2022.1404.sm1.pdf]

Web Appendix A: Involuntary Job Separations in National Data

The table below shows the BLS reported industry-specific percentages of involuntary job separations in the United States in January 2017 (the last month of our observation period). We match the 28 companies in our sample with the closest BLS industries/subindustries using the observed company names and industry classifications. The weighted average of the percent of involuntary job separations out of the total separations is 27.3%.

| # Companies | # Terminated Employees | Industry                                        | BLS Industry/Subindustry                 | Sample Weights | % Involuntary Job Separations |
|-------------|------------------------|-------------------------------------------------|------------------------------------------|----------------|-------------------------------|
| 5           | 48,993                 | Banking & finance                               | Finance & Insurance                      | 30.2%          | 22.6%                         |
| 2           | 4,275                  | Insurance                                       | Finance & Insurance                      | 2.6%           | 22.6%                         |
| 5           | 57,891                 | Retail                                          | Retail trade                             | 35.7%          | 23.1%                         |
| 1           | 7,076                  | Retail                                          | Accommodation & food services            | 4.4%           | 27.6%                         |
| 2           | 13,017                 | Utilities & energy                              | Transportation, warehousing, & utilities | 8.0%           | 49.0%                         |
| 1           | 7,112                  | Consumer & miscellaneous products manufacturing | Manufacturing                            | 4.4%           | 33.9%                         |
| 1           | 3,055                  | Consumer & miscellaneous products manufacturing | Non-durable goods                        | 1.9%           | 34.0%                         |
| 1           | 5,066                  | Consumer & miscellaneous products manufacturing | Educational services                     | 3.1%           | 37.8%                         |
| 7           | 13,183                 | Diversified manufacturing                       | Manufacturing                            | 8.1%           | 33.9%                         |
| 1           | 1,198                  | Electronics & electrical                        | Durable goods                            | 0.7%           | 33.7%                         |
| 2           | 1,494                  | Food & beverage                                 | Accommodation & food services            | 0.9%           | 27.6%                         |

## Web Appendix B: NAICS Codes for the Industries in Our Estimation Sample

The table below shows the 8 industries in our sample and the closest NAICS and SIC identification codes associated with each one. For diversified manufacturing, we did not find a matching NAICS or SIC code. Along with the industry and state fixed effects, we also include firm size to control for the unobservables that may drive benefit plan attractiveness.

| Industry                                        | NAICS code       | SIC code         |
|-------------------------------------------------|------------------|------------------|
| Banking & finance                               | 52               | 60-61            |
| Insurance                                       | 52               | 63-64            |
| Retail                                          | 44-45            | 52-59            |
| Utilities & energy                              | 22               | 49               |
| Consumer & miscellaneous products manufacturing | 32-33            | 39               |
| Diversified manufacturing                       | No specific code | No specific code |
| Electronics & electrical                        | 4431             | 5731             |
| Food & beverage                                 | 7223-7225, 4453  | 54, 58           |

Web Appendix C1: Default Contribution Rate and Escalation Features for Plans with Auto-Escalation

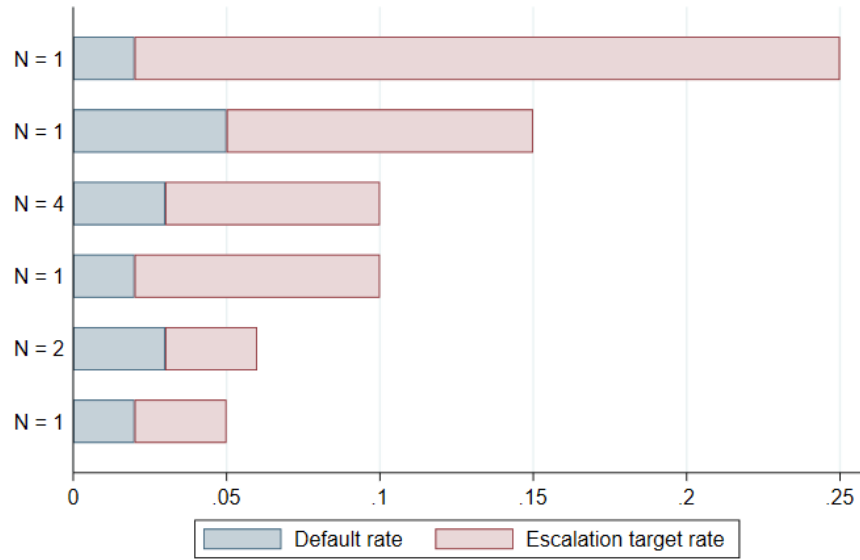

Web Appendix C2: Default Contribution Rate for Plans Without Auto-Escalation

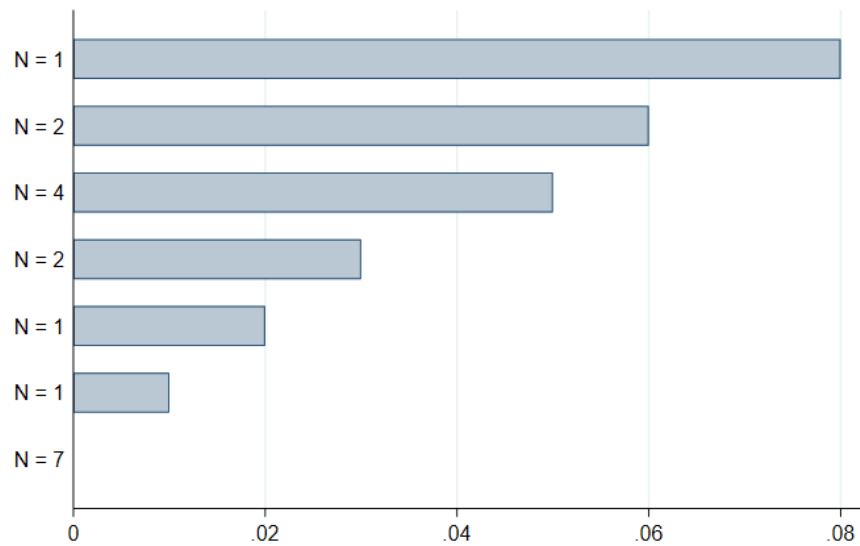

### Web Appendix D: Distribution of Key Retirement Plan Features

| Match Rate (1 <sup>st</sup> tier) | Match Threshold (1 <sup>st</sup> tier) | Match Rate (2 <sup>nd</sup> tier) | Match Threshold (2 <sup>nd</sup> tier) | Effective Match at Max Threshold | # Plans | # Terminating Employees |
|-----------------------------------|----------------------------------------|-----------------------------------|----------------------------------------|----------------------------------|---------|-------------------------|
| 30%                               | 15%                                    | -                                 | -                                      | 30%                              | 1       | 5,066                   |
| 50%                               | 5%                                     | -                                 | -                                      | 50%                              | 1       | 253                     |
| 50%                               | 8%                                     | -                                 | -                                      | 50%                              | 2       | 1,155                   |
| 75%                               | 6%                                     | -                                 | -                                      | 75%                              | 1       | 7,112                   |
| 100%                              | 4%                                     | -                                 | -                                      | 100%                             | 1       | 17,337                  |
| 100%                              | 5%                                     | -                                 | -                                      | 100%                             | 6       | 49,348                  |
| 100%                              | 6%                                     | -                                 | -                                      | 100%                             | 7       | 39,413                  |
| 75%                               | 3%                                     | 25%                               | 4%                                     | 63%                              | 1       | 7,076                   |
| 100%                              | 1%                                     | 50%                               | 6%                                     | 58%                              | 1       | 3,297                   |
| 100%                              | 2%                                     | 50%                               | 4%                                     | 75%                              | 1       | 1,572                   |
| 100%                              | 3%                                     | 50%                               | 5%                                     | 80%                              | 4       | 22,557                  |
| 100%                              | 3%                                     | 50%                               | 7%                                     | 71%                              | 1       | 3,127                   |
| 300%                              | 1%                                     | 100%                              | 5%                                     | 140%                             | 1       | 5,047                   |

### Web Appendix E: Histograms of Leakage Withdrawal by Loan Status

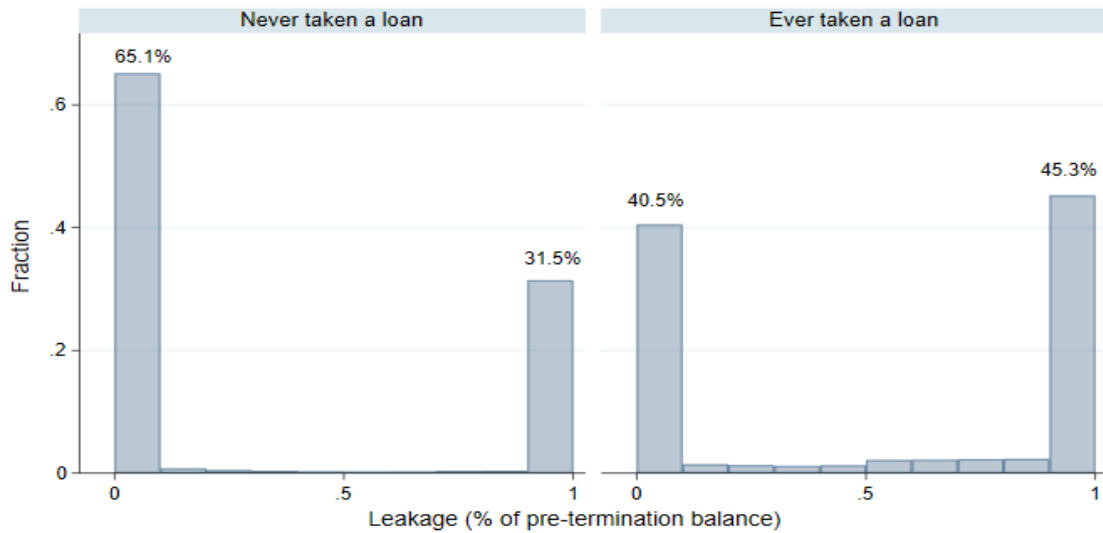

Web Appendix F: Random Effect Logistic Model on Multiple Withdrawals

|                          | Estimate | SE    |     |
|--------------------------|----------|-------|-----|
| Intercept                | -2.935   | 1.453 | *   |
| Log income               | -0.028   | 0.131 |     |
| Months since termination | -0.289   | 0.035 | *** |
| Months since last leak   | 0.109    | 0.054 | *   |
| Number of withdrawals    | 0.957    | 0.069 | *** |
| With outstanding loans   | 1.804    | 0.109 | *** |
| $\sigma_u$               | 1.017    | 0.197 |     |
| $\rho$                   | 0.239    | 0.071 |     |
| N of obs.                | 974,391  |       |     |
| Log likelihood           | -132,416 |       |     |

Note: Dependent variable is whether there is cashout leakage in each month following job termination. Standard errors are clustered at the individual level.

Web Appendix G: Leakage Rate and Employer Contribution Proportion Excluding Small Balances Less Than \$1,000

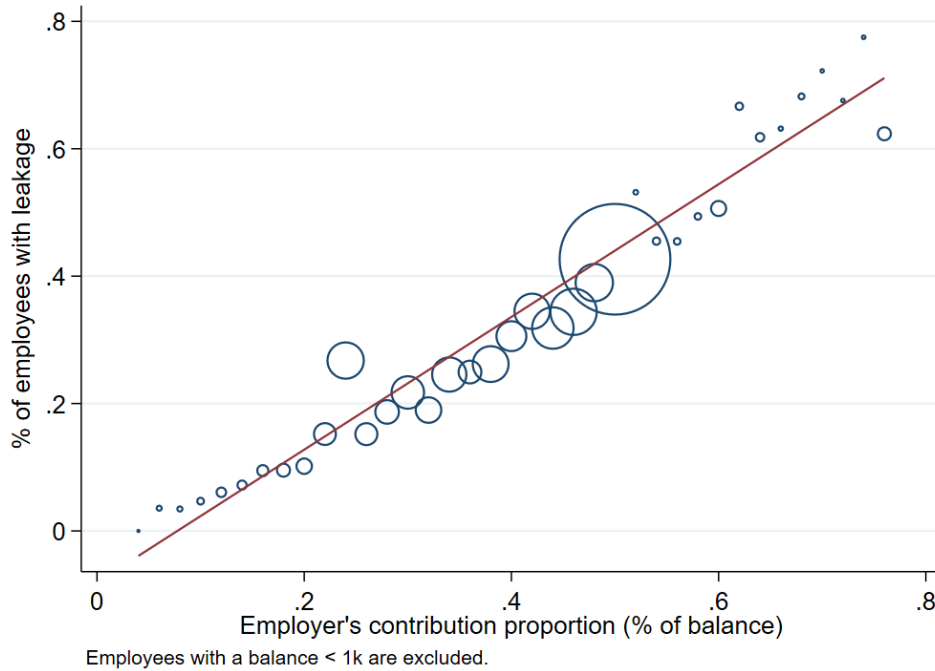

Web Appendix H: Variation in Net Turnover Rates and Contribution Rates across Industries

|                            | Number of companies | Employee contribution rate | Match rate | Net turnover rate |
|----------------------------|---------------------|----------------------------|------------|-------------------|
| Banking/Finance            | 5                   | 5.4% (5.8%)                | 100% (-)   | 0.026 (0.102)     |
| Consumer/Misc Products Mfg | 3                   | 7.1% (5.5%)                | 65% (26%)  | 0.039 (0.113)     |
| Diversified Manufacturing  | 7                   | 7.0% (5.2%)                | 84% (19%)  | 0.013 (0.243)     |
| Electronics/Electrical     | 1                   | 9.4% (8.2%)                | 100% (-)   | 0.019 (0.029)     |
| Food & Beverage            | 2                   | 7.3% (4.5%)                | 84% (8%)   | 0.019 (0.094)     |
| Insurance                  | 2                   | 6.4% (4.3%)                | 80% (-)    | 0.032 (0.103)     |
| Retail                     | 6                   | 5.0% (4.4%)                | 92% (19%)  | 0.009 (0.077)     |
| Utilities/Energy           | 2                   | 5.7% (3.6%)                | 97% (12%)  | 0.046 (0.061)     |

Note: standard deviations in the parentheses; the net turnover rate is calculated as the difference in the number of terminating employees and new hires in the current month divided by the total employees in the previous month.

Web Appendix I1: Relationship between Leakage Rate and Employee Contribution Proportion by Laid-off among Those with Below Median Income

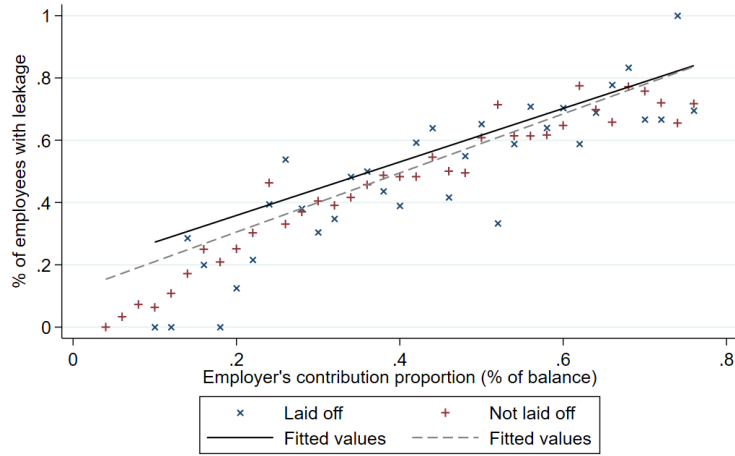

Note: The slope is insignificantly different between laidoff vs not laidoff employees (p-value=0.693)

Web Appendix I2: Relationship between Leakage Rate and Employee Contribution Proportion by Laid-off among Those with Above Median Income

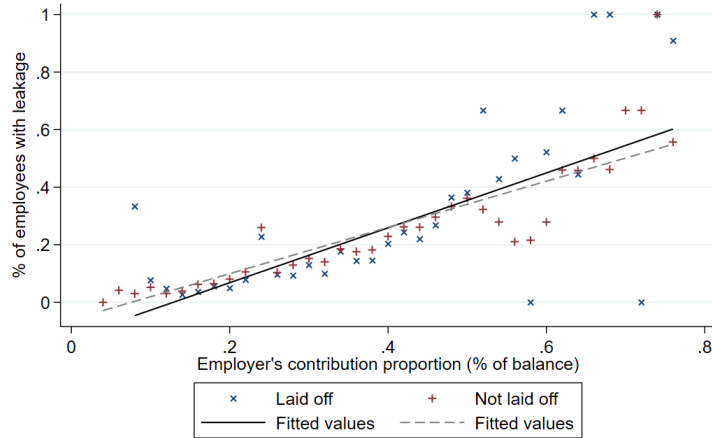

Note: The slope is insignificantly different between laidoff vs not laidoff employees (p-value=0.426)

Web Appendix J: Relationship between Leakage Rate and Employee Contribution Rate

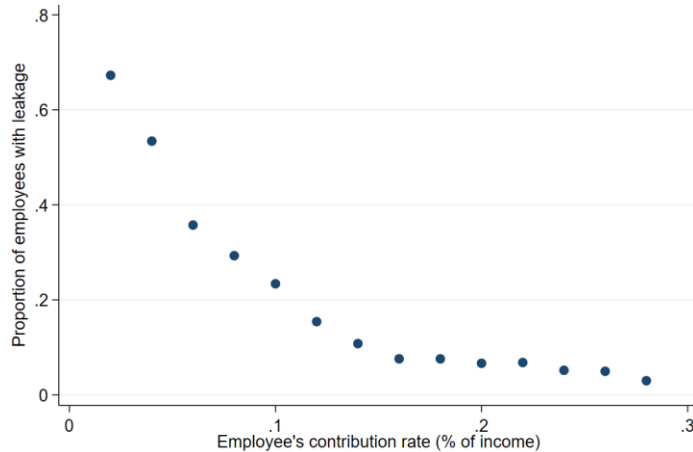

## Web Appendix K: A Simulation Study

The goal of the simulation study is to show that we can recover the true parameters in a full-information approach by using instrumental variables  $W_1$  and  $W_2$  for endogenous variables  $Y_1$  and  $Y_2$  and allowing for a full variance-covariance structure without imposing any restrictions of the parameters across equations. We simulate 100,000 cross-sectional observations following the five equations below. The setting is analogous to the retirement account leakage decision in the paper. We are interested in the coefficients,  $\beta_1$  and  $\beta_2$ , of variables  $Y_3$  and  $Y_4$  in the final Probit equation ( $Y_5$ ). Both  $Y_3$  and  $Y_4$  are nonlinear functions of endogenous variables  $Y_1$  and  $Y_2$ . Given the correlated error terms across equations, common shock enters the data-generating process of all five equations and introduces the endogeneity issue of  $Y_3$  and  $Y_4$  in the Probit equation of  $Y_5$ .

$$Y_1 = \alpha_0 + \alpha_1 X_1 + \alpha_2 W_1 + \varepsilon_1$$

$$Y_2 = \gamma_0 + \gamma_1 X_2 + \gamma_2 W_2 + \varepsilon_2$$

$$Y_3 = \delta_0 + \delta_1 Y_1 \times \exp(Y_2) + \delta_2 X_1 + \delta_3 X_2 + \varepsilon_3$$

$$Y_4 = \theta_0 + \theta_1 I(Y_1 > X_1) + \theta_2 Y_2 + \theta_3 X_1 + \theta_4 X_2 + \varepsilon_4$$

$$Y_5^* = \beta_0 + \beta_1 Y_3 + \beta_2 Y_4 + \beta_3 X_1 + \beta_4 X_2 + \varepsilon_5, \quad Y_5 = \begin{cases} 1 & \text{if } Y_5^* \geq 0 \\ 0 & \text{otherwise} \end{cases}$$

where  $\varepsilon \sim N(0, \Sigma)$

We show that as long as we have instrumental variables  $W_1$  and  $W_2$  for endogenous variables  $Y_1$  and  $Y_2$ , respectively, we will be able to recover the true parameters using the limited-information approach, even when the endogenous variables enter the equations non-linearly. The table below shows that a limited-information approach that allows full variance-covariance error-structure across equations and uses instrumental variables can recover true parameters well. We also show that the key parameters of interest,  $\beta_1$  and  $\beta_2$ , would be biased without correcting for endogeneity. We compare the limited-information approach with a two-stage least-square approach. We thank the review team for pointing out that the two-stage least-square approach would over-correct endogeneity coefficients in our context.

Table: Simulation Estimation Results

|                            | True Value | Full Information | Leakage Probit Alone | Two-Stage Least-Square Approach |
|----------------------------|------------|------------------|----------------------|---------------------------------|
| Employee Contribution (Y1) |            |                  |                      |                                 |
| Intercept                  | -0.5       | -0.506 (0.001)   |                      |                                 |
| X1                         | 0.5        | 0.502 (0.001)    |                      |                                 |
| W1                         | 0.5        | 0.501 (0.001)    |                      |                                 |
| Log Tenure Years (Y2)      |            |                  |                      |                                 |
| Intercept                  | -1         | -0.998 (0.003)   |                      |                                 |
| X2                         | 0.3        | 0.299 (0.002)    |                      |                                 |
| W2                         | 0.2        | 0.198 (0.001)    |                      |                                 |
| Log Balance (Y3)           |            |                  |                      |                                 |
| Intercept                  | -3         | -3.007 (0.004)   |                      |                                 |
| Y1*exp(Y2)                 | 1          | 1.004 (0.003)    |                      |                                 |
| X1                         | -0.2       | -0.198 (0.003)   |                      |                                 |

|                                     |       |                |                |                |
|-------------------------------------|-------|----------------|----------------|----------------|
| X2                                  | -0.2  | -0.201 (0.002) |                |                |
| <b>Employer Contribution % (Y4)</b> |       |                |                |                |
| Intercept                           | -2    | -2.004 (0.002) |                |                |
| I(Y1>X1)                            | -1    | -0.999 (0.001) |                |                |
| Y2                                  | 1     | 0.998 (0.003)  |                |                |
| X1                                  | 0.3   | 0.302 (0.001)  |                |                |
| X2                                  | 0.3   | 0.301 (0.001)  |                |                |
| <b>Leakage or Not (Y5)</b>          |       |                |                |                |
| Intercept                           | -2    | -2.064 (0.068) | -2.162 (0.036) | -2.000 (0.073) |
| Log Balance                         | -1    | -1.019 (0.014) | -1.251 (0.009) | -0.791 (0.012) |
| Employer Contribution %             | 1     | 1.004 (0.014)  | 1.199 (0.012)  | 0.528 (0.015)  |
| X1                                  | 1     | 1.010 (0.013)  | 0.965 (0.010)  | 0.682 (0.012)  |
| X2                                  | 1     | 1.008 (0.012)  | 0.940 (0.036)  | 0.615 (0.011)  |
| <b>Correlations among equations</b> |       |                |                |                |
| 1-2                                 | 0.3   | 0.301 (0.003)  |                |                |
| 1-3                                 | 0.5   | 0.499 (0.003)  |                |                |
| 1-4                                 | 0.4   | 0.399 (0.003)  |                |                |
| 1-5                                 | -0.15 | -0.139 (0.010) |                |                |
| 2-3                                 | 0.3   | 0.295 (0.003)  |                |                |
| 2-4                                 | 0.2   | 0.200 (0.007)  |                |                |
| 2-5                                 | -0.08 | -0.072 (0.012) |                |                |
| 3-4                                 | 0.4   | 0.395 (0.003)  |                |                |
| 3-5                                 | -0.3  | -0.288 (0.012) |                |                |
| 4-5                                 | 0.3   | 0.307 (0.009)  |                |                |

*Note: Standard errors in parentheses*

Web Appendix L: Robustness Checks of the Results of Leakage Decision at Job Termination

|                                                           | (1) all the estimation sample |     | (2) all the estimation sample |         | (3) excluding small balance |         | (4) exclude age 55 + |     |
|-----------------------------------------------------------|-------------------------------|-----|-------------------------------|---------|-----------------------------|---------|----------------------|-----|
| Employer contribution proportion                          | 0.990<br>(0.459)              | **  | 0.955<br>(0.472)              | **      | 1.100<br>(0.435)            | **      | 0.994<br>(0.471)     | **  |
| Log balance                                               | -0.337<br>(0.020)             | *** | -0.338<br>(0.020)             | **<br>* | -0.300<br>(0.026)           | **<br>* | -0.338<br>(0.021)    | *** |
| Employer contribution proportion<br>× Demeaned log income | 0.073<br>(0.159)              |     | /                             |         | /                           |         | /                    |     |
| Employer contribution proportion<br>× laid-off index      | /                             |     | 0.050<br>(0.057)              |         | /                           |         | /                    |     |
| All the other control variables                           | Yes                           |     | Yes                           |         | Yes                         |         | Yes                  |     |
| N of obs.                                                 | 162,360                       |     | 162,360                       |         | 140,625                     |         | 150,075              |     |

Note: (1) Standard errors clustered by company-year in parentheses; (2) \*  $p < 0.1$ , \*\*  $p < 0.05$ , \*\*\*  $p < 0.01$ ; (3) all the other control variables in the leakage equation (1) in Table 12 are included. They are omitted here to reserve space.
